# Supplementary material
Source: PubMed Central journal article supplement (PMC3130564)

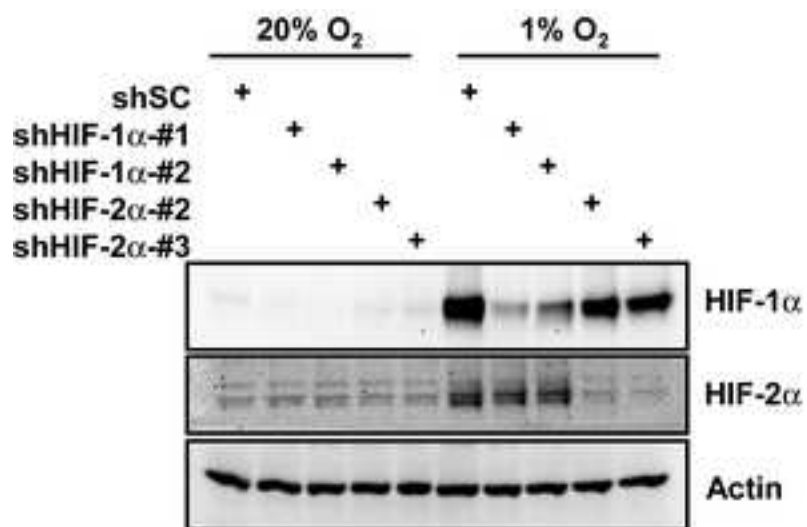

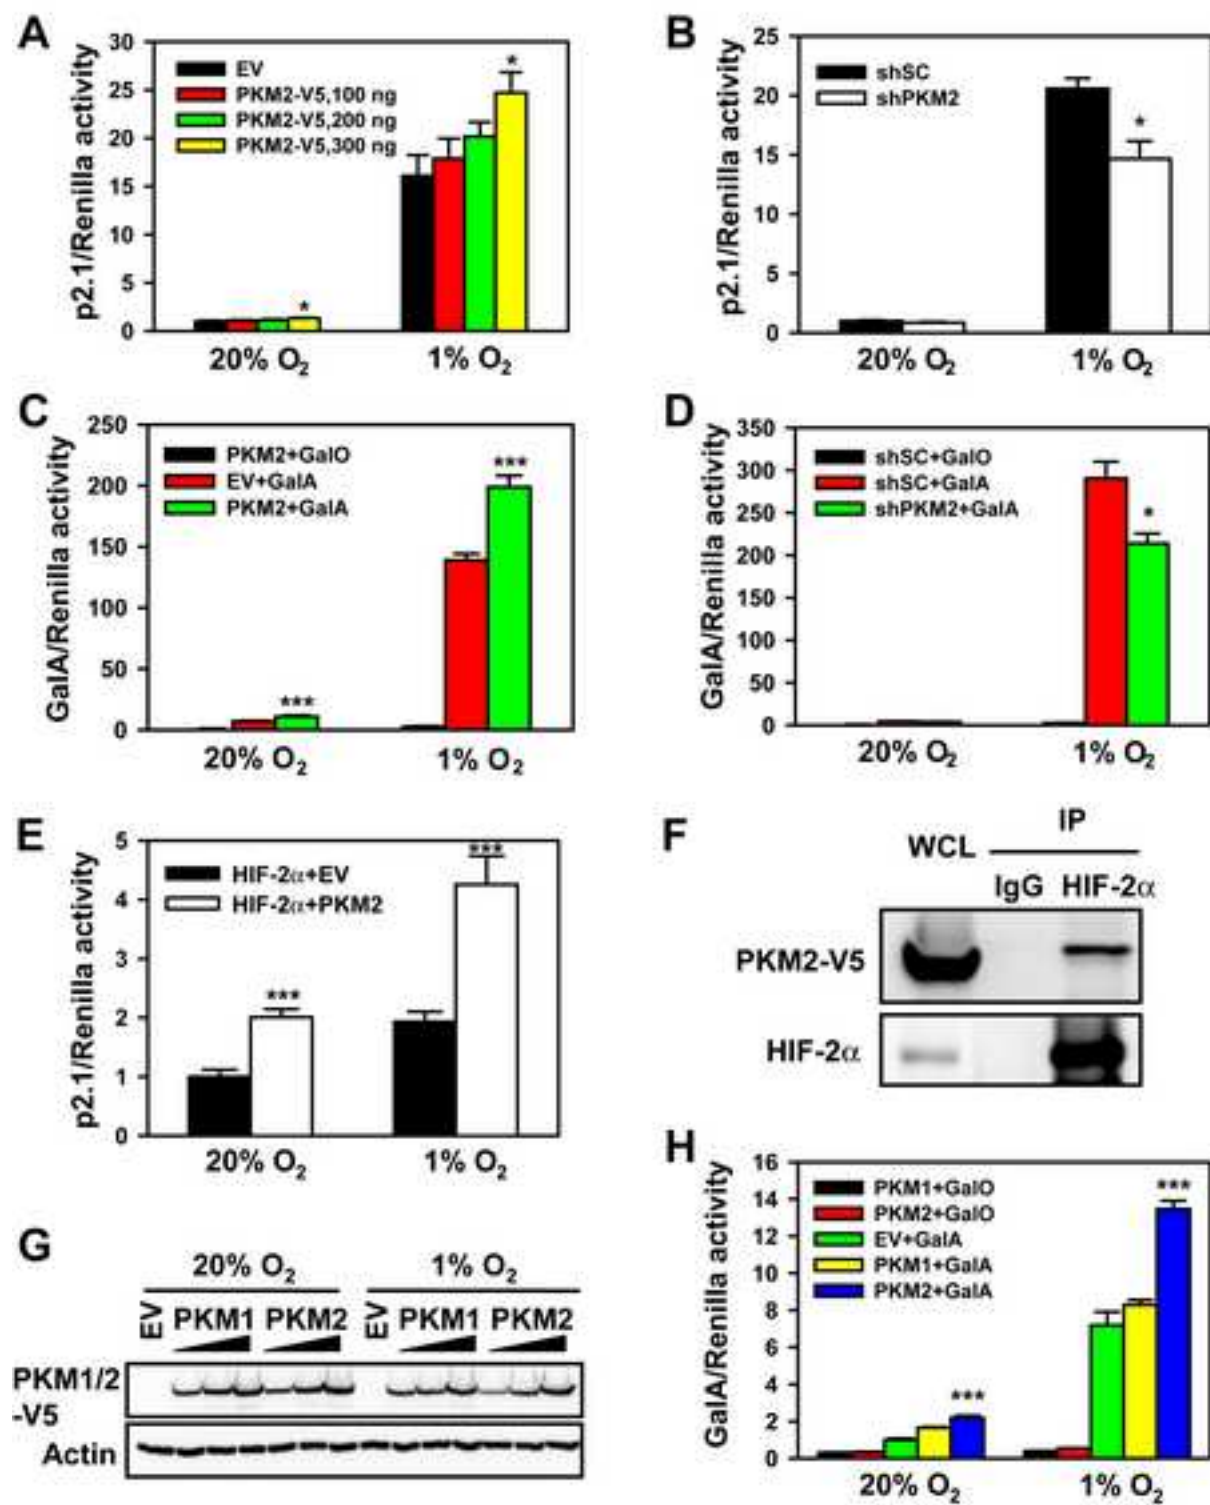

Figure S2

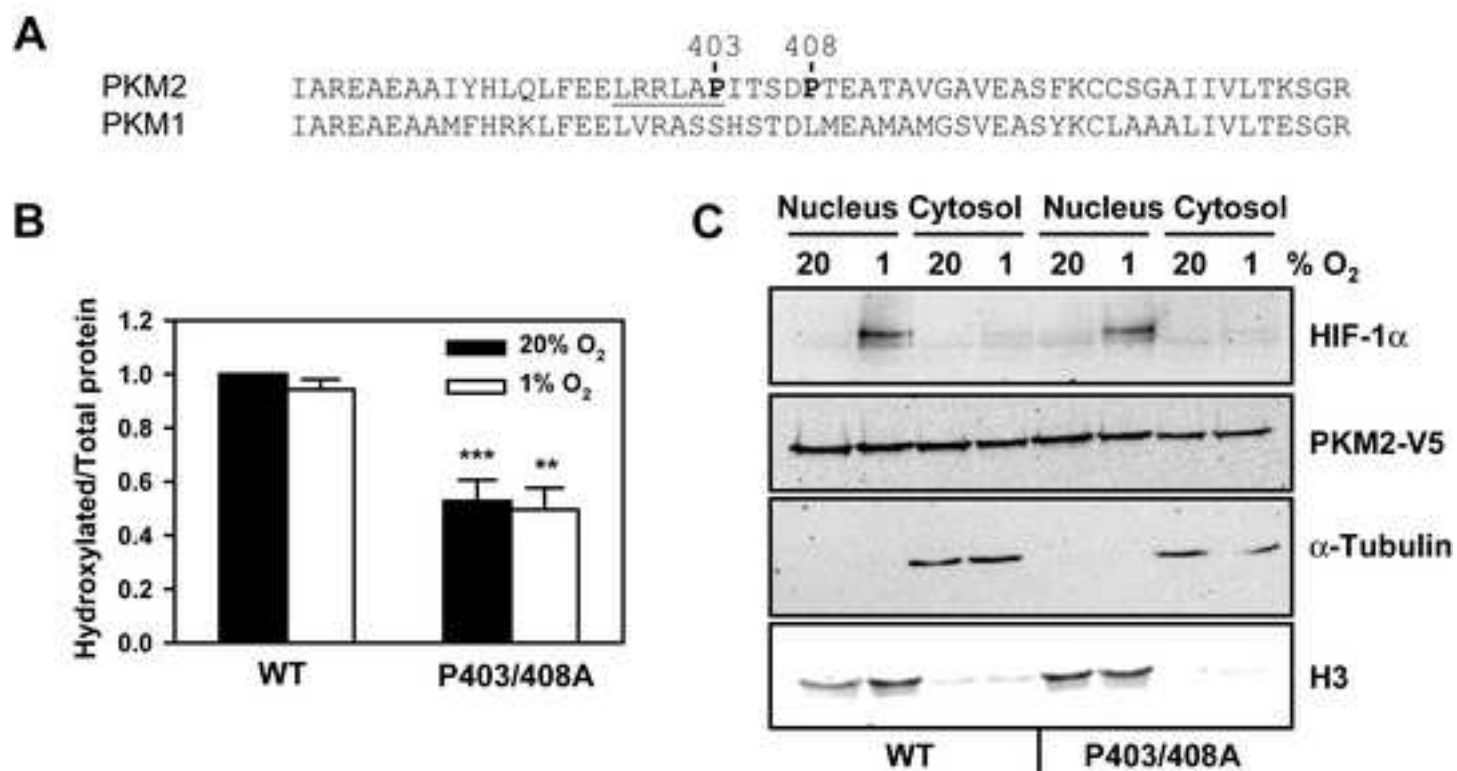

Figure S3

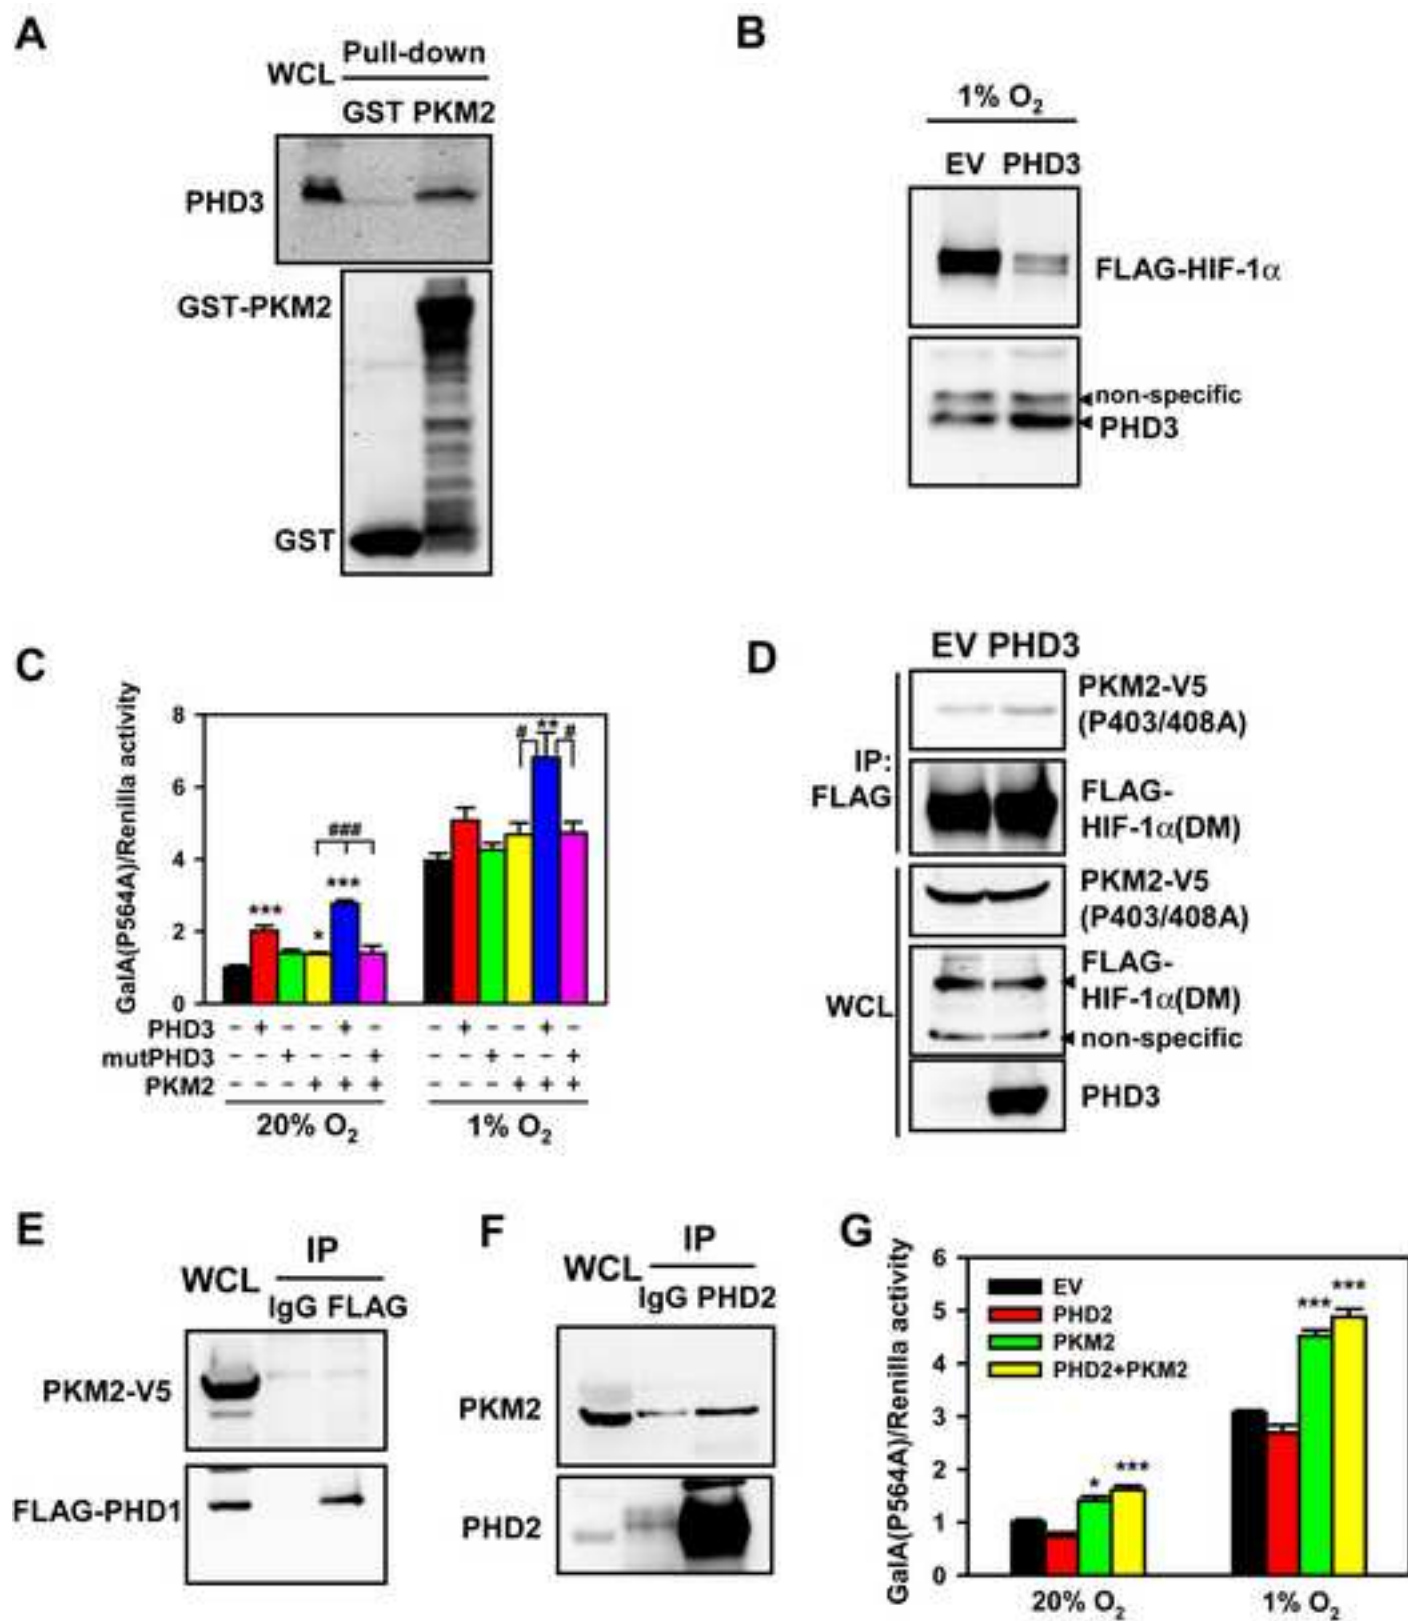

Figure S4

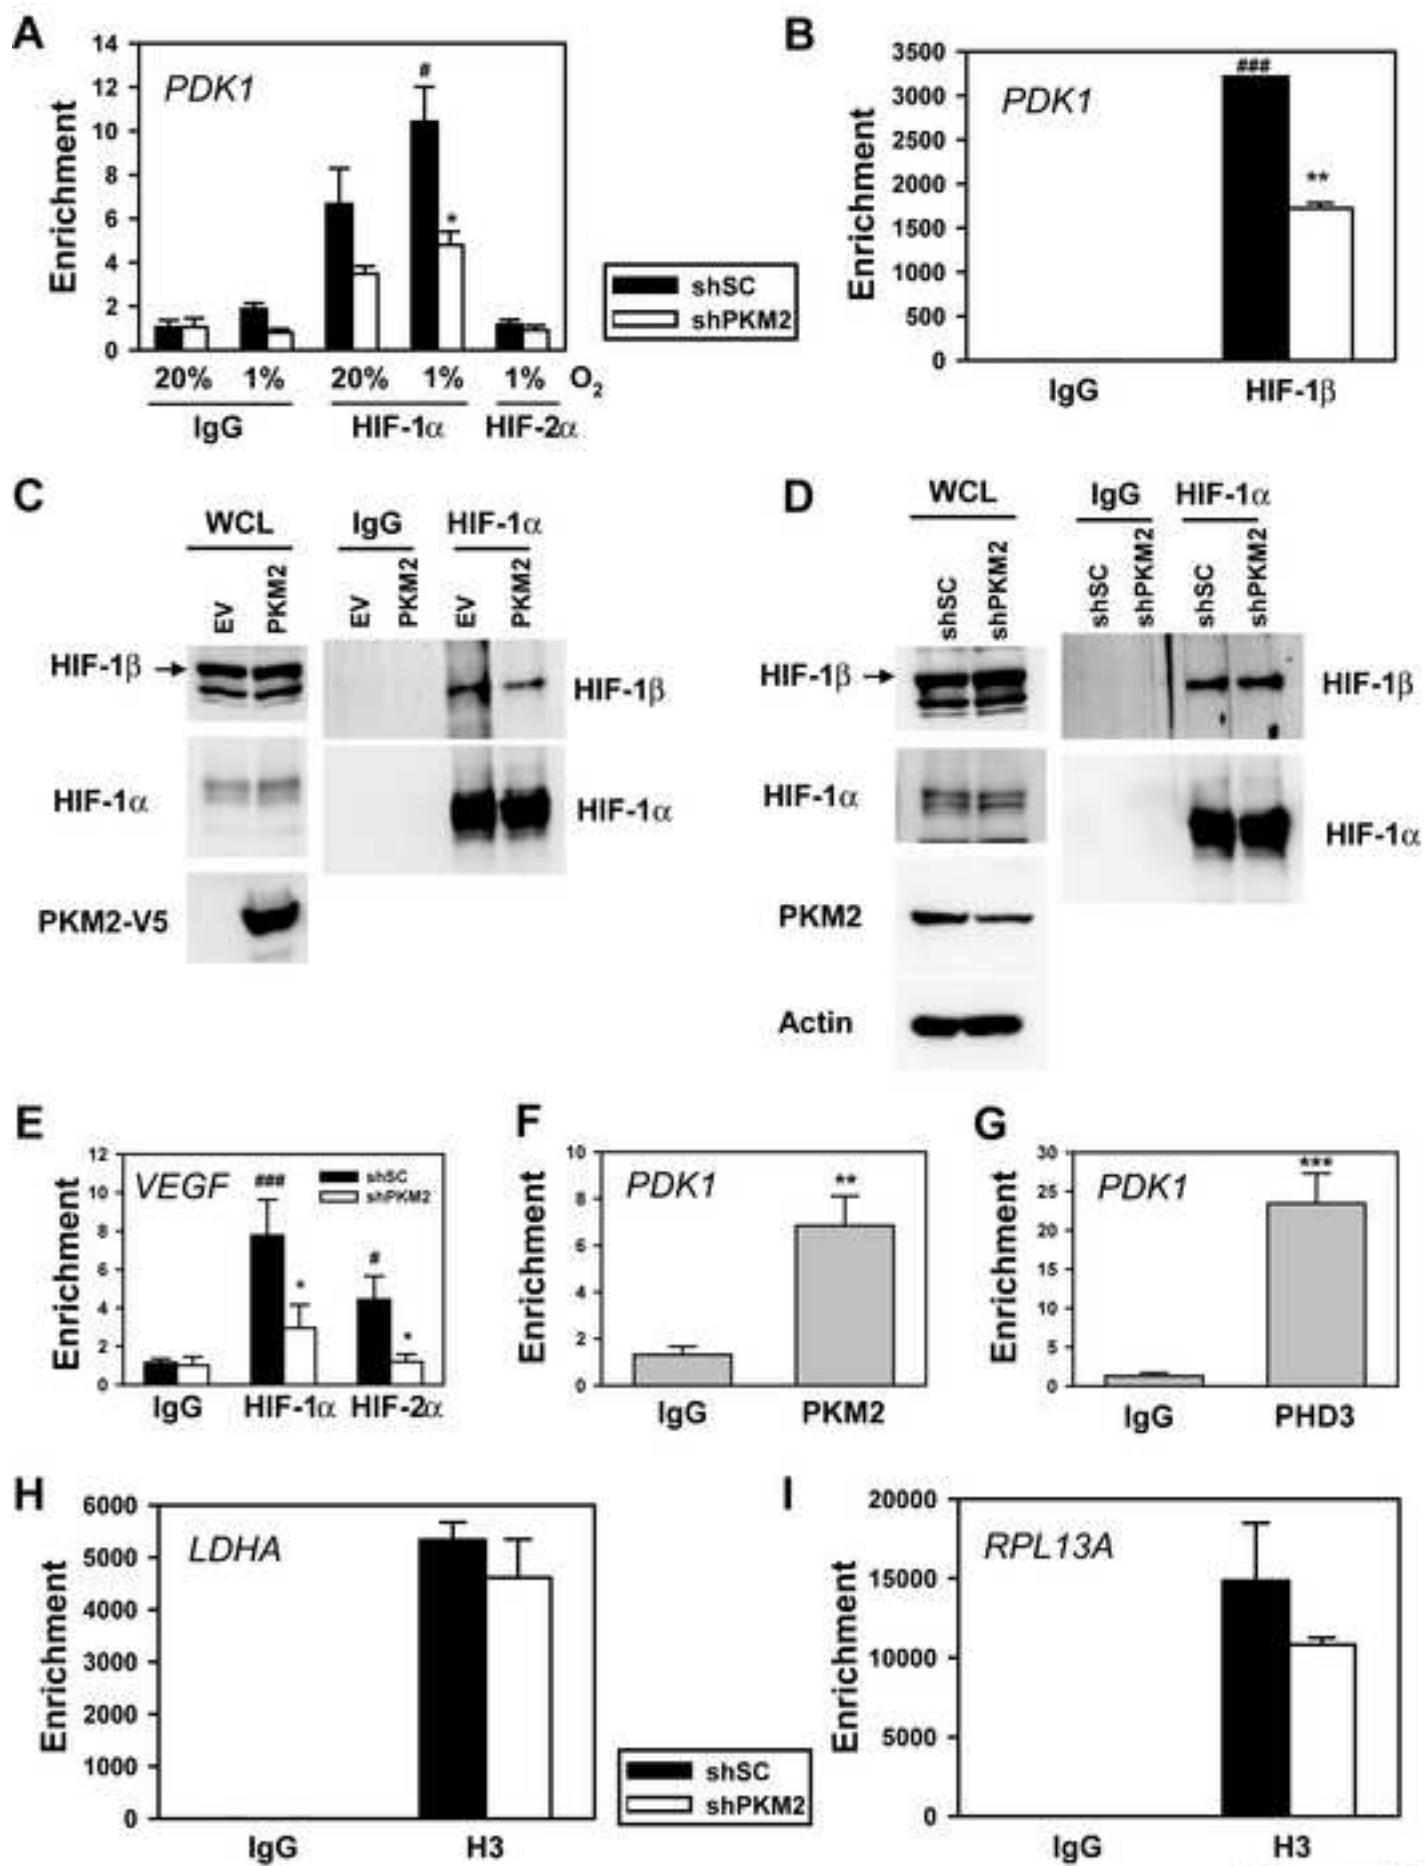

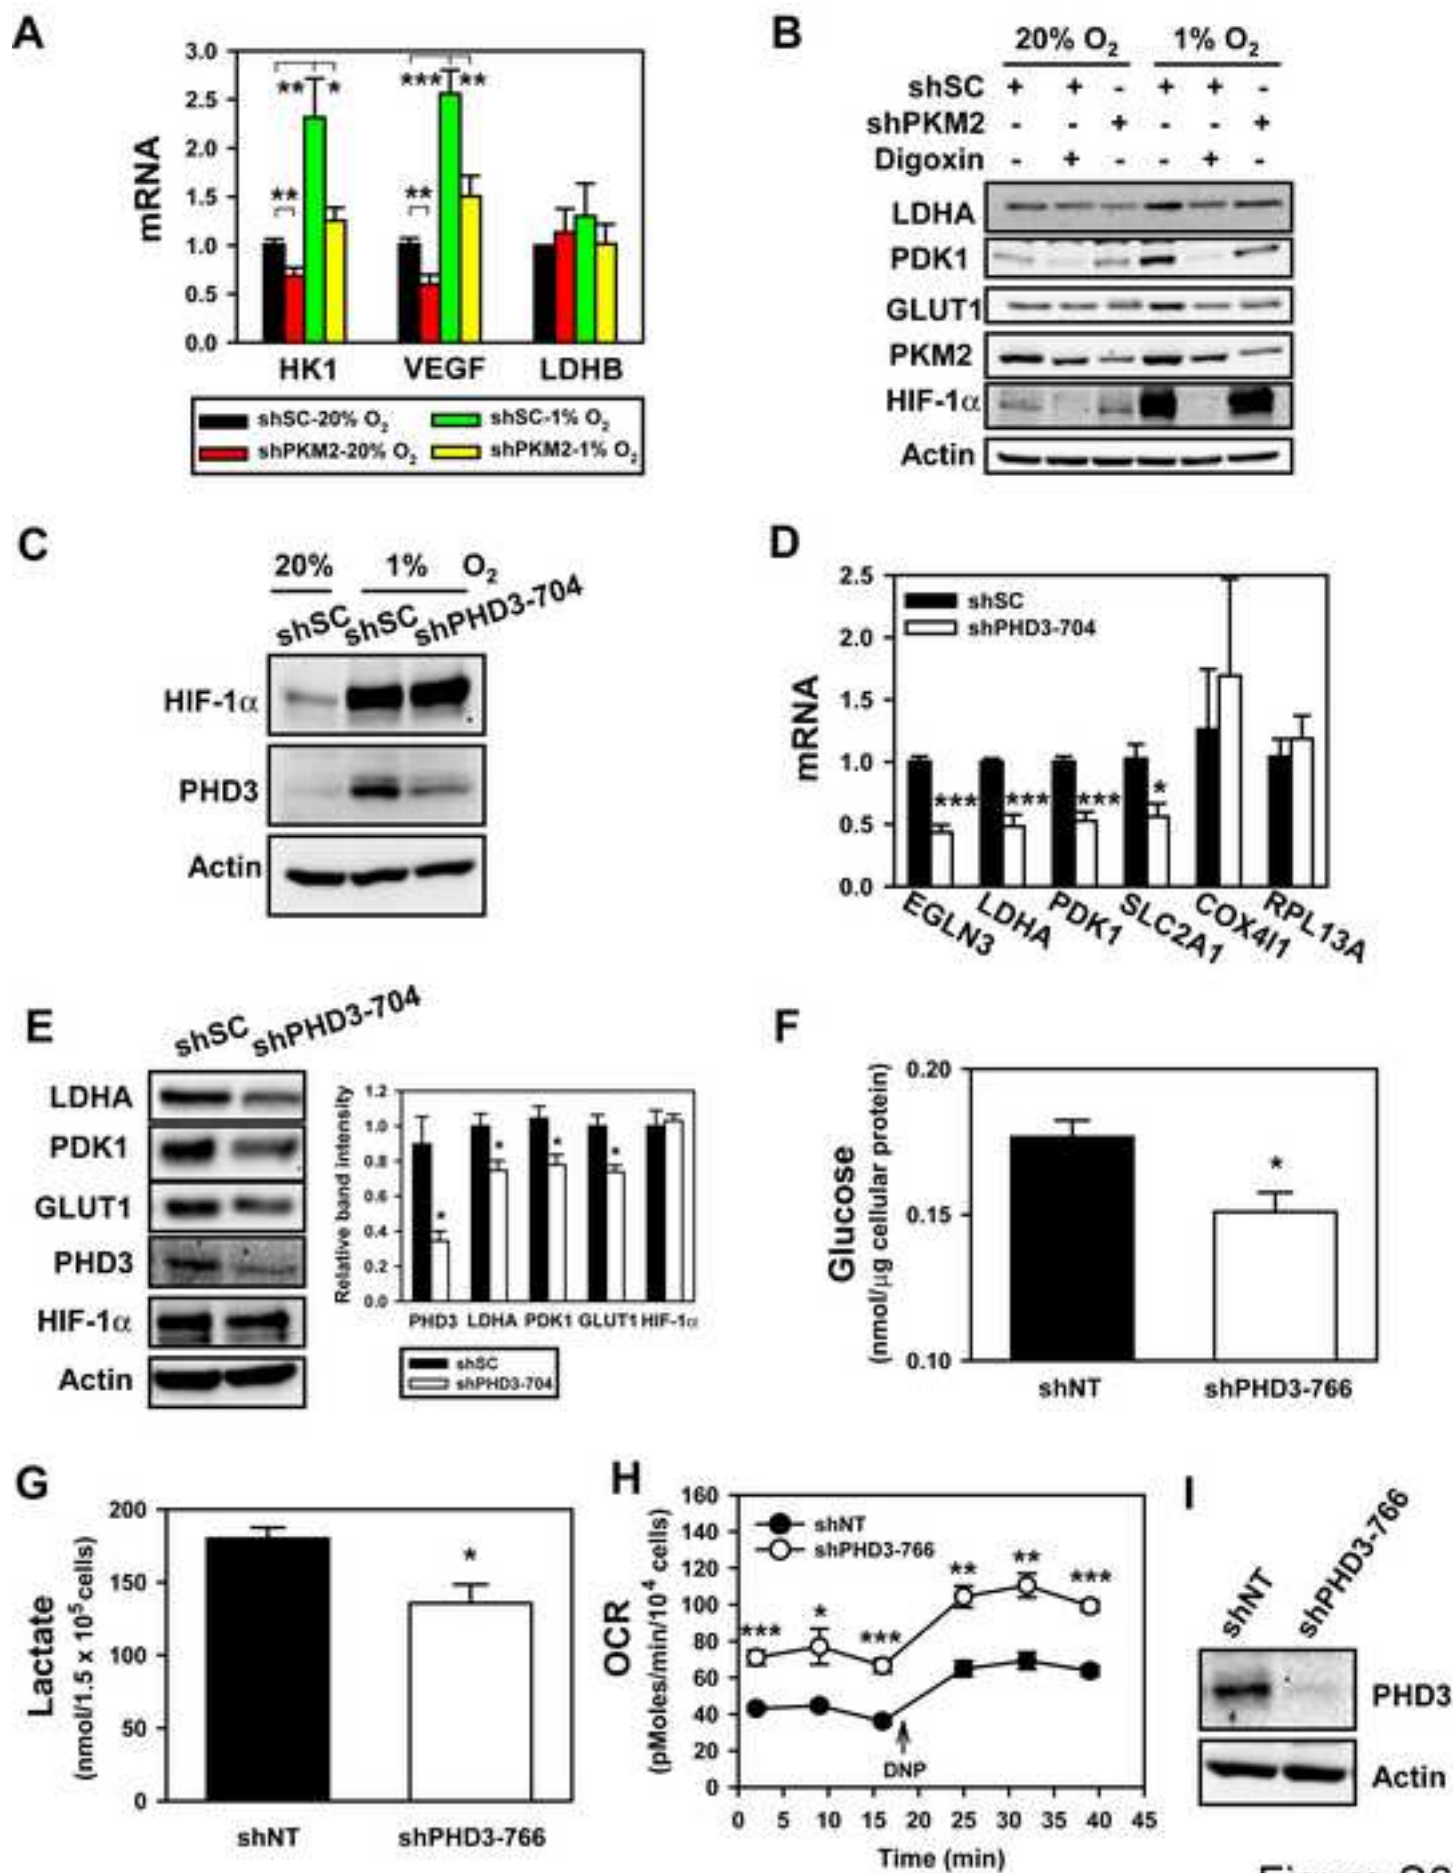

Figure S6

Supplement: NIHMS292303-supplement-02.pdf [file NIHMS292303-supplement-02.pdf]
